# Supplementary material
Source: MDPI journal article supplement (https://www.mdpi.com/2311-7524/9/7/743)
Supplement: s1 [file s1 › Figure S1.pdf]

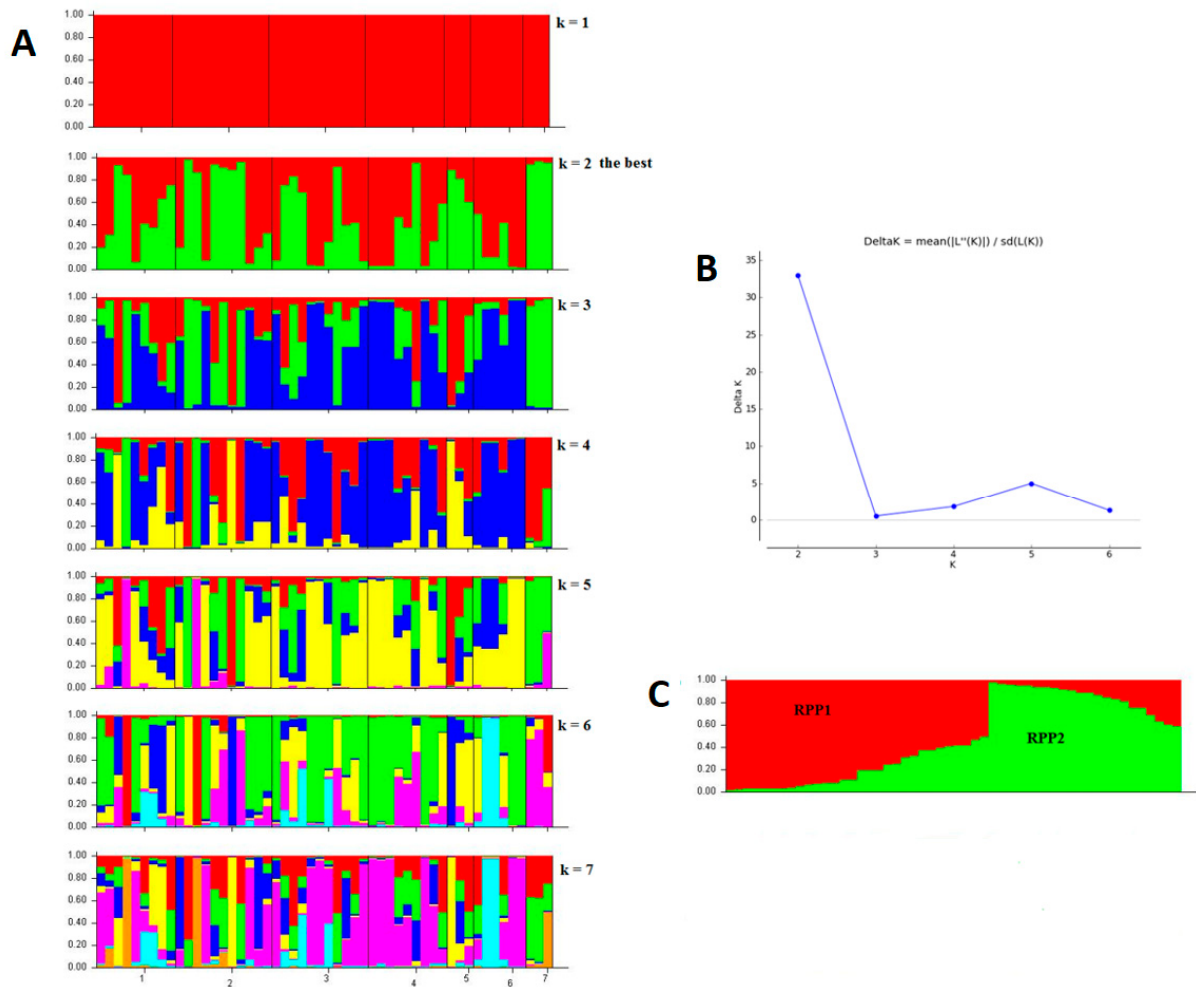

**Figure S1.** Population structure of predefined Kara grape sub-populations based on 22 SSR data **(A)**. The graph showing the best K value as 2 (the highest peak) **(B)**. Reconstructed panmictic populations (RPPs) groups general distribution **(C)**.
