# Supplementary material
Source: MDPI journal article supplement (https://www.mdpi.com/2311-7524/9/7/743)
Supplement: s1 [file s1 › Table S1.pdf]

**Table S1.** Some ampelographic characteristics and original collection locations of Kara grape accessions used in this study

| List No | Cultivar Name       | Population (region)-Location (city/town/village) | Cluster Form | Berry Form  | Berry Color | Flavor     | Seed no. | Ripening        |
|---------|---------------------|--------------------------------------------------|--------------|-------------|-------------|------------|----------|-----------------|
| 1       | Kara Üzüm           | Mediterranean-Adana/Feke/Gökçeli                 | Cylindrical  | Elliptic    | Black       | Sweet      | 1-2      | Late August     |
| 2       | Dingil Kara         | Mediterranean-Antalya/Akseki/Dikmen              | Cylindrical  | Round       | Black       | Very Sweet | 2        | Late September  |
| 3       | Deli Kara           | Marmara-Balıkesir/Kepsut/Merkez                  | Conical      | Round       | Black       | Sweet      | 3        | Early September |
| 4       | Yumuşak Kara        | Marmara-Bilecik/Söğüt/Merkez                     | Conical      | Ellipsoidal | Black       | Sweet      | 1-3      | Late September  |
| 5       | Kokulu Kara         | Marmara-Bilecik/Söğüt/Küre                       | Conical      | Ellipsoidal | Black       | Sweet      | 1-2      | Early October   |
| 6       | Beyaz Saplı Kara    | Marmara-Bilecik/Söğüt/Merkez                     | Conical      | Ellipsoidal | Black       | Sweet      | 1-2      | Late September  |
| 7       | Tombak Kara         | Black Sea-Bolu/Seben/Kozyaka                     | Conical      | Round       | Black       | Sweet      | 3        | Late September  |
| 8       | Tongur Kara         | Black Sea-Bolu/Göynük/Himmetoğlu                 | Cylindrical  | Yuvarlak    | Black       | Sweet      | 2        | Late September  |
| 9       | Aşıkara Sultaniyesi | Aegean-Denizli/Buldan/Yenice                     | Conical      | Ellipsoidal | Black       | Sour       | 1-2      | Late July       |
| 10      | Ekşi Kara           | Aegean-Denizli/Acıpayam/Yeşilyuva                | Cylindrical  | Elliptic    | Black       | Neutral    | 2-4      | Mid-September   |
| 11      | Eski Kara           | Aegean-Denizli/Çal/İsabey                        | Conical      | Round       | Black       | Sweet      | 1-2      | Mid-August      |

|    |               |                                             |             |             |       |         |     |                |
|----|---------------|---------------------------------------------|-------------|-------------|-------|---------|-----|----------------|
| 12 | Siyah Üzüm    | East Anatolia-<br>Diyarbakır/Ergani/Bademli | Conical     | Elliptic    | Black | Sweet   | 2-3 | Late July      |
| 13 | Bulgar Karası | Marmara-<br>Edirne/Uzunköprü/<br>Kırcasalih | Conical     | Elliptic    | Black | Sweet   | 2-3 | Late September |
| 14 | Geç Kara      | Black Sea-<br>Giresun/Merkez/Kayadibi       | Conical     | Elliptic    | Black | Neutral | 1-3 | Late September |
| 15 | Kara Üzüm     | Black Sea-<br>Gümüşhane/Merkez/-            | Cylindrical | Round       | Black | Sweet   | 2   | Late October   |
| 16 | Kara Üzüm     | Mediterranean-<br>Hatay/Reyhanlı/Merkez     | Conical     | Ellipsoidal | Black | Sweet   | 2-3 | Mid-August     |
| 17 | Siyah Üzüm    | Mediterranean-<br>Hatay/İtınözü/Merkez      | Conical     | Elliptic    | Black | Kokulu  | 2-3 | Late August    |
| 18 | Acı Kara      | Mediterranean-<br>Isparta/Merkez/Çünür      | Conical     | Round       | Black | Sweet   | 2-3 | Late September |
| 19 | Kel Kara      | Mediterranean-<br>İçel/Merkez/Musalı        | Cylindrical | Round       | Black | Sweet   | 1-2 | Early August   |
| 20 | Pat Kara      | Mediterranean-<br>İçel/Merkez/Musalı        | Cylindrical | Round       | Black | Neutral | 2-3 | Late August    |
| 21 | Takkara       | Mediterranean-<br>İçel/Gülnar/Sarıkavak     | Conical     | Ellipsoidal | Black | Neutral | 2   | Late August    |
| 22 | Deli Takkara  | Mediterranean-<br>İçel/Gülnar/Sarıkavak     | Conical     | Round       | Black | Neutral | 3-4 | Late September |
| 23 | Kara Üzüm     | Aegean-<br>İzmir/Ödemiş/Kaymakçı            | Cylindrical | Round       | Black | Sweet   | 2   | Late June      |
| 24 | Sikkara       | Aegean-<br>İzmir/Ödemiş/Kaymakçı            | Conical     | Round       | Black | Sweet   | 1   | Early July     |

|    |                |                                          |                |             |       |         |     |                |
|----|----------------|------------------------------------------|----------------|-------------|-------|---------|-----|----------------|
| 25 | Kara Üzüm      | Black Sea-Kastamonu/Tosya/Çiftel         | Conical        | Round       | Black | Sweet   | 1-3 | Mid-September  |
| 26 | Kara Üzüm      | Marmara-Kırklareli/Merkez                | Conical        | Round       | Black | Sweet   | 3-4 | Late September |
| 27 | Miri Kara      | Marmara-Kırklareli/Merkez                | Conical        | Round       | Black | Sweet   | 2   | Early August   |
| 28 | İyi Bağ Karası | Marmara-Kocaeli/Gebze/Tavşanlı           | Conical        | Elliptic    | Black | Sweet   | 1-2 | Mid-September  |
| 29 | Siyah Üzüm     | Central Anatolia-Konya/Hadim/Yağcı       | Cylindrical    | Round       | Black | Sweet   | 2   | Late September |
| 30 | Yerli Siyah    | Central Anatolia-Konya/Karaman/Pınarbaşı | Cylindrical    | Ellipsoidal | Black | Sweet   | 1-2 | Late September |
| 31 | Siyah Üzüm     | East Anatolia-Malatya/Arapkir/Budak      | Conical        | Ellipsoidal | Black | Sweet   | 3-4 | Late September |
| 32 | Siyah Üzüm     | East Anatolia-Mardin/Savur/Gölbaşı       | Conical        | Ellipsoidal | Black | Sweet   | 2-3 | Mid-September  |
| 33 | Sofra Karası   | Aegean-Muğla/Ula/Merkez                  | Winged Conical | Silindirik  | Black | Neutral | 1-3 | Early October  |
| 34 | Yerli Kara     | Aegean-Muğla/Ula/Merkez                  | Cylindrical    | Round       | Black | Sweet   | 2   | Early August   |
| 35 | Aydın Karası   | Aegean-Muğla/Ula/Merkez                  | Winged Conical | Round       | Black | Sweet   | 2   | Late October   |
| 36 | Katı Kara      | Aegean-Muğla/Ula/Merkez                  | Conical        | Round       | Black | Neutral | 1-3 | Mid-October    |
| 37 | Kayseri Karası | Central Anatolia-Nevşehir                | Conical        | Ellipsoidal | Black | Sweet   | 1-3 | Mid-September  |
| 38 | Katikara       | Black Sea-Ordu/Merkez/Karacaömer         | Conical        | Round       | Black | Sweet   | 1-2 | Mid-September  |

|    |                   |                                                      |             |             |       |         |     |                    |
|----|-------------------|------------------------------------------------------|-------------|-------------|-------|---------|-----|--------------------|
| 39 | Katikara          | Black Sea-<br>Ordu/Merkez/Karacaömer                 | Conical     | Round       | Black | Neutral | 1-2 | Mid-<br>September  |
| 40 | Kozan<br>Karası   | Marmara-<br>Sakarya/Geyve<br>/Umurbey                | Conical     | Round       | Black | Sweet   | 3   | Early<br>September |
| 41 | Yerli Kara        | Marmara-<br>Sakarya/Geyve<br>/Umurbey                | Cylindrical | Round       | Black | Sweet   | 2   | Mid-<br>September  |
| 42 | Siyah Üzüm        | Black Sea-<br>Samsun/Vezirköprü/<br>Kızılcaören      | Conical     | Round       | Black | Sweet   | 2-4 | Early October      |
| 43 | Siyah Üzüm        | Black Sea-<br>Sinop/Gerze/Kabanlar                   | Conical     | Ellipsoidal | Black | Neutral | 3   | Early October      |
| 44 | Siyah Üzüm        | Black Sea-<br>Sinop/Gerze/Kabanlar                   | Cylindrical | Round       | Black | Neutral | 2-3 | Mid-<br>September  |
| 45 | Patlak Kara       | Central Anatolia-<br>Sivas/Gemerek/Çepni             | Cylindrical | Round       | Black | Sweet   | 2-3 | Mid-October        |
| 46 | Ağustos<br>Karası | Marmara -<br>Tekirdağ/Şarköy/Çınarlı                 | Conical     | Ellipsoidal | Black | Sweet   | 1-3 | Early<br>September |
| 47 | Siyah Üzüm        | Central Anatolia -<br>Yozgat/Merkez                  | Conical     | Ellipsoidal | Black | Sweet   | 1-4 | Early<br>September |
| 48 | Ekşi Kara         | Central Anatolia -<br>Yozgat/Merkez/<br>Salmanfakılı | Conical     | Ellipsoidal | Black | Neutral | 2-3 | Mid-<br>September  |
| 49 | Kara Üzüm         | Black Sea-<br>Zonguldak/Sarfranbolu/<br>Yazı         | Conical     | Ellipsoidal | Black | Sweet   | 2   | Early October      |
