# Supplementary material
Source: MDPI journal article supplement (https://www.mdpi.com/2311-7524/9/7/743)
Supplement: s1 [file s1 › Table S2.xlsx]

## Sheet: OIV Data Analysis
Dendrogram No	List no/Population	Cultivar Name	Location-City	OIV 004	OIV 007	OIV 008	OIV 016	OIV 051.1	OIV 051.2	OIV 053	OIV 066.1	OIV 066.2	OIV 066.3	OIV 066.4	OIV 066.5	OIV 068.1	OIV 068.2	OIV 070.1	OIV 076.1	OIV 077.1	OIV 077.2	OIV 077.3	OIV 077.4	OIV 078.1	OIV 078.2	OIV 079.1	OIV 079.2	OIV 081	OIV 083.1	OIV 083.2	OIV 084.1	OIV 085.1	OIV 151	OIV 221.1	OIV 221.2	OIV 223	OIV 225	OIV 230	OIV 242.1	OIV 242.2	OIV 243	OIV 503
	Mediterranean
1	1	Kara Üzüm	Adana	9	3	1	1	2	1	9	5	5	5	5	1	3	3	1	2	3	3	3	3	3	3	1	7	3	2	1	9	1	3	5	3	4	3	1	3	5	1	3
2	2	Dingil Kara	Antalya	3	2	1	1	2	1	1	5	5	5	3	5	3	3	2	2	3	3	3	3	5	5	3	7	2	3	2	3	3	3	3	5	2	3	1	5	7	3	3
3	16	Kara Üzüm	Hatay	1	2	1	1	3	5	1	5	7	7	5	5	5	3	1	2	7	5	5	5	5	7	3	5	1	2	2	1	1	3	9	7	8	3	1	7	9	5	9
4	17	Siyah Üzüm	Hatay	5	1	1	1	2	5	5	5	7	7	3	5	5	7	1	2	7	7	5	5	7	7	7	7	1	1	1	1	1	3	7	5	6	3	1	7	7	3	5
5	18	Acı Kara	Isparta	5	3	1	1	2	1	1	3	3	5	3	3	3	5	2	2	3	3	1	3	5	5	3	7	1	3	2	1	1	5	9	7	8	3	1	7	7	5	7
6	19	Kel Kara	Mersin	7	2	3	1	1	1	5	5	5	5	3	3	3	5	1	2	7	5	5	5	7	7	7	7	1	2	2	3	1	3	7	7	3	3	1	5	5	3	5
7	20	Pat Kara	Mersin	7	2	3	1	3	1	5	7	7	7	3	5	5	5	1	2	5	5	5	3	7	5	3	5	1	2	1	3	1	3	7	7	3	3	1	7	5	5	7
8	21	Takkara	Mersin	5	2	3	1	3	5	1	3	5	5	3	5	1	1	2	2	7	5	5	5	7	7	5	7	1	2	2	3	1	3	7	7	6	3	1	5	3	3	5
9	22	Deli Takkara	Mersin	5	1	2	1	3	1	5	5	5	5	3	5	5	5	2	3	5	5	5	5	5	5	5	5	1	2	1	3	1	5	7	5	3	3	1	7	5	7	5
	Marmara
10	3	Deli Kara	Balıkesir	7	3	2	1	1	5	5	7	7	7	3	5	3	5	2	2	5	5	5	5	5	5	5	9	2	2	2	7	5	3	5	5	2	3	1	5	7	3	5
11	4	Yumuşak Kara	Bilecik	5	1	1	1	2	1	1	3	5	5	3	3	5	5	1	3	3	3	3	3	5	3	3	7	1	3	3	1	1	3	7	5	4	3	1	7	9	5	5
12	5	Kokulu Kara	Bilecik	5	2	1	1	2	1	5	5	5	5	3	3	5	5	1	3	5	3	3	3	5	5	3	9	1	3	3	1	1	3	5	5	3	3	1	7	7	5	5
13	6	Beyaz Saplı Kara	Bilecik	9	2	1	1	3	5	1	3	3	5	3	3	5	5	4	4	1	1	3	3	1	3	5	7	1	3	1	1	1	3	5	5	3	3	1	5	9	5	3
14	28	İyi Bağ Karası	Kocaeli	7	2	1	1	3	1	1	5	5	5	3	3	3	3	2	2	3	3	3	3	5	5	3	5	1	3	3	1	1	3	9	5	9	3	1	5	5	3	7
15	13	Bulgar Karası	Edirne	5	2	1	1	1	1	1	3	3	3	1	3	3	1	1	5	3	3	3	3	5	5	5	9	1	1	1	5	5	5	7	5	4	3	1	3	7	3	5
16	26	Kara Üzüm	Kırklareli	5	2	1	1	3	5	1	5	5	5	3	7	1	1	4	5	5	5	3	3	7	5	3	7	1	3	1	1	1	3	5	3	7	3	2	7	9	5	3
17	27	Miri Kara	Kırklareli	5	2	1	1	1	1	1	3	5	5	3	3	3	5	1	3	3	3	5	3	3	3	5	7	1	3	3	1	1	3	5	3	3	3	1	3	5	7	3
18	40	Kozan Karası	Sakarya	9	2	1	1	2	1	5	3	3	5	3	1	3	5	3	2	1	3	1	3	3	3	7	9	2	1	1	5	5	3	7	5	3	3	1	7	9	3	5
19	41	Yerli Kara	Sakarya	9	2	1	1	2	1	5	3	5	5	3	5	3	3	1	2	5	5	3	5	5	5	5	9	2	2	3	3	1	3	5	5	3	3	1	7	7	3	5
20	46	Ağustos Karası	Tekirdağ	5	2	1	1	1	5	5	3	5	5	1	3	3	3	1	3	3	3	3	3	5	5	5	5	1	3	3	7	5	3	3	1	6	2	1	5	7	1	1
	Black Sea
21	7	Tombak Kara	Bolu	9	3	2	1	2	1	9	5	5	5	3	5	3	5	4	1	3	3	5	3	3	3	5	7	2	2	2	7	1	4	7	5	6	3	1	5	5	3	5
22	8	Tongur Kara	Bolu	3	3	2	1	2	1	1	3	5	3	3	3	3	3	2	2	3	3	3	3	5	3	3	7	1	2	2	9	1	4	7	5	5	3	1	5	5	3	5
23	14	Geç Kara	Giresun	3	1	2	1	3	1	1	5	5	5	3	5	3	5	1	3	7	5	5	3	7	7	3	5	1	1	1	1	1	5	5	5	4	3	1	7	5	7	3
24	15	Kara Üzüm	Gümüşhane	5	2	1	1	2	1	1	3	5	5	1	5	1	3	3	2	3	3	3	5	3	3	3	7	1	3	3	1	1	3	5	5	3	3	1	5	9	5	3
25	25	Kara Üzüm	Kastamonu	9	3	2	1	2	1	5	5	5	5	3	5	3	3	2	2	3	3	3	3	5	5	3	9	2	2	2	3	5	5	5	5	3	3	1	5	7	3	5
26	38	Katıkara	Ordu	1	2	2	1	3	1	1	5	5	5	3	5	5	5	2	2	7	5	5	5	7	7	3	5	1	1	1	1	1	3	5	5	3	3	1	7	5	5	5
27	39	Katıkara	Ordu	1	1	2	1	3	1	1	5	5	5	3	3	5	5	1	2	7	5	5	5	7	7	3	7	1	1	1	1	1	3	7	5	7	3	1	7	5	5	3
28	42	Siyah Üzüm	Samsun	5	1	3	1	1	1	1	5	5	7	3	5	5	5	1	2	5	5	5	5	5	5	3	5	1	2	2	3	1	5	7	7	4	3	1	9	5	7	5
29	43	Siyah Üzüm	Sinop	7	2	1	1	2	1	5	3	5	5	1	5	5	5	4	2	1	3	5	3	1	3	3	5	2	2	2	5	1	3	5	5	3	3	1	7	9	5	3
30	44	Siyah Üzüm	Sinop	9	2	1	1	3	1	5	5	5	5	3	5	5	5	2	2	5	5	3	3	5	7	3	7	1	1	1	3	3	3	7	7	3	3	1	5	5	3	5
31	49	Kara Üzüm	Zonguldak	5	1	1	1	1	1	9	5	5	5	3	3	3	3	3	3	5	5	5	5	5	7	5	7	2	2	2	7	1	4	5	3	4	3	1	5	7	5	5
	Aegean
32	9	Aşıkara Sultaniyesi	Denizli	9	2	1	1	2	1	1	5	5	5	3	3	5	5	1	4	1	3	3	3	3	5	3	5	1	3	3	5	1	3	7	7	3	3	1	7	7	3	5
33	10	Ekşi Kara	Denizli	5	3	2	1	2	1	5	3	3	3	3	3	1	3	3	2	1	1	1	1	3	3	3	7	1	1	3	3	5	3	7	5	4	3	1	7	9	5	5
34	11	Eski Kara	Denizli	9	2	2	1	1	5	9	5	5	5	3	3	3	3	2	2	5	3	3	5	5	5	3	7	1	3	3	3	3	3	3	3	3	3	1	5	5	1	3
35	23	Kara Üzüm	İzmir	7	3	2	1	2	1	5	5	5	5	1	3	3	5	4	3	3	3	3	3	3	5	3	7	1	3	4	3	1	3	5	5	3	3	1	3	5	3	3
36	24	Sıkkara	İzmir	7	3	2	1	3	1	1	5	5	7	3	3	5	5	2	3	3	3	3	3	5	5	3	7	1	1	3	1	1	3	5	3	3	3	1	7	7	3	3
37	33	Sofra Karası	Muğla	5	2	1	1	2	1	1	5	5	5	1	5	3	3	1	3	3	3	3	3	5	5	1	5	1	3	3	1	1	3	9	7	4	3	1	9	9	5	9
38	34	Yerli Kara	Muğla	9	2	1	1	3	5	5	3	5	5	1	3	3	3	1	2	3	3	1	3	5	5	3	7	1	3	3	3	1	3	5	5	3	3	1	5	7	3	3
39	35	Aydın Karası	Muğla	1	2	1	1	3	1	1	3	5	5	3	3	3	5	1	3	3	3	3	3	3	5	3	5	1	3	3	3	1	3	5	5	3	3	1	7	7	5	5
40	36	Katı Kara	Muğla	3	1	1	1	2	1	1	5	5	5	3	5	3	3	1	2	5	3	3	3	5	5	3	7	3	3	3	3	1	3	5	3	3	3	1	7	7	5	3
	East Anatolia
41	12	Siyah Üzüm	Diyarbakır	3	2	3	1	3	5	1	7	7	9	5	9	3	5	1	2	7	7	5	5	7	7	1	3	1	3	3	1	1	3	7	5	6	3	1	7	5	5	5
42	32	Siyah Üzüm	Mardin	1	2	3	1	3	5	1	5	5	5	3	5	3	3	1	2	5	5	5	5	7	7	3	5	1	2	2	1	1	5	7	7	6	3	1	7	5	5	7
43	31	Siyah Üzüm	Malatya	1	2	3	1	1	1	1	5	7	7	3	5	3	3	1	2	5	5	3	5	9	7	5	5	1	3	3	1	1	3	5	5	3	3	1	7	3	5	5
	Central Anatolia
44	37	Kayseri Karası	Nevşehir	3	1	2	1	1	1	1	7	7	7	3	3	3	5	1	4	5	5	5	5	7	5	5	5	1	3	3	1	1	3	5	5	3	3	1	7	5	5	5
45	45	Patlak Kara	Sivas	5	3	2	1	1	5	1	7	7	7	1	3	3	3	3	2	5	3	3	5	5	3	3	7	2	3	3	3	3	3	7	5	3	3	1	5	7	3	7
46	47	Siyah Üzüm	Yozgat	5	2	1	1	1	5	1	7	7	7	3	3	3	3	3	2	5	5	3	3	7	3	3	7	1	3	3	3	1	5	5	5	3	3	1	5	9	3	5
47	48	Ekşi Kara	Yozgat	7	2	1	1	1	5	5	5	5	5	3	5	5	5	4	3	5	3	5	5	5	5	3	9	1	3	3	7	3	5	5	5	3	3	1	7	9	3	5
48	29	Siyah Üzüm	Konya	9	3	2	1	3	1	9	3	3	5	3	3	5	5	4	2	3	3	3	3	3	5	3	7	1	3	3	5	1	3	5	3	4	3	1	7	7	5	3
49	30	Yerli Siyah	Konya	9	3	1	1	3	1	5	1	3	5	3	3	5	5	1	2	1	3	3	3	3	3	3	7	1	3	3	5	1	3	5	5	4	3	1	7	7	3	3

## Sheet: Characteristic Description
OIV Code	Characteristics	Notations
OIV 004	Young Shoot: density of prostrate hairs on tip	1=none or very sparse
		3=sparse
		5=medium
		7=dense
		9=very dense
OIV 007	Shoot: color of dorsal side of internodes	1=green
		2=green with red stripes
		3=red
OIV 008	Shoot: color of ventral side of internodes	1=green
		2=green with red stripes
		3=red
OIV 016	Tentrils: distribution on the shoot	1=discontinuous(2 or less)
		2=subcontinuous or continues (3 or more)
OIV 051-1	Young leaf: color of the upper side (leaf 1-3)	1=green-yellow
		2=bronze spots
		3= copper-reddish
OIV 051-2	Young leaf: color of the upper side (leaf 4-6)	1=green-yellow
		2=bronze spots
		3= copper-reddish
OIV 053	Young leaf: density of prostrate hairs between veins	1=none-sparse
		5=medium
		9=dense
OIV 066-1	Mature leaf: length of vein N1	1=very short (75 mm or less)
		3=short (105 mm)
		5=medium (135 mm)
		7=long (165 mm)
		9=very long (195 mm or more)
OIV 066-2	Mature leaf: length of vein N2	1=very short (65 mm or less)
		3=short (85 mm)
		5=medium (105 mm)
		7=long (125 mm)
		9=very long (145 mm or more)
OIV 066-3	Mature leaf: length of vein N3	1=very short (35 mm or less)
		3=short (55 mm)
		5=medium (75 mm)
		7=long (95 mm)
		9=very long (115 mm or more)
OIV 066-4	Mature leaf: length of vein N5	1=very short (15 mm or less)
		3=short (25 mm)
		5=medium (35 mm)
		7=long (45 mm)
		9=very long (55 mm or more)
OIV 066-5	Mature leaf: vein N3, length petiole sinus to vein N4	1=very short (4 mm or less)
		3=short (8 mm)
		5=medium (12 mm)
		7=long (16 mm)
		9=very long (20 mm or more)
OIV 068-1	Mature leaf: length petiole sinus to upper leaf sinus	1=very short (30 mm or less)
		3=short (50 mm)
		5=medium (70 mm)
		7=long (90 mm)
		9=very long (110 mm or more)
OIV 068-2	Mature leaf: length petiole sinus to lower leaf sinus	1=very short (30 mm or less)
		3=short (45 mm)
		5=medium (60 mm)
		7=long (75 mm)
		9=very long (90 mm or more)
OIV 070-1	Mature leaf: anthocyanin coloration of the main veins	1=no coloration to
		4=more than one quarter of veins colored.
OIV 076-1	Mature leaf: shape of teeth	1=both sides concave
		2=both sides rectilinear
		3=mixture between notes 2 and 4
		4=both sides convex
		5=one side concave, one side convex
OIV 077-1	Mature leaf: length of teeth N2	1=very short (6 mm or less)
		3=short (10 mm)
		5=medium (14 mm)
		7=long (18 mm)
		9=very long (22 mm or more)
OIV 077-2	Mature leaf: length of teeth N4	1=very short (6 mm or less)
		3=short (10 mm)
		5=medium (14 mm)
		7= long (18 mm)
		9=very long (22 mm or more)
OIV 077-3	Mature leaf: width of teeth N2	1=very short (6 mm or less)
		3=short (10 mm)
		5=medium (14 mm)
		7= long (18 mm)
		9=very long (22 mm or more)
OIV 077-4	Mature leaf: width of teeth N4	1=very short (6 mm or less)
		3=short (10 mm)
		5=medium (14 mm)
		7= long (18 mm)
		9=very long (22 mm or more)
OIV 078-1	Mature leaf: length to width of teeth N2	1=small ( 0.3 or less)
		3=small to medium (0.6)
		5=medium (0.9)
		7=medium to large (1.2)
		9=large (1.5 or more)
OIV 078-2	Mature leaf: length to width of teeth N4	1=small ( 0.3 or less)
		3=small to medium (0.6)
		5=medium (0.9)
		7=medium to large (1.2)
		9=large (1.5 or more)
OIV 079-1	Mature leaf: opening / overlapping of petiole sinus	1=wide open (-35 mm or less)
		3=open (-15 mm)
		5=closed (5 mm)
		7=overlapping (25 mm)
		9=very overlapping (45 mm or more)
OIV 079-2	Mature leaf: Angel between vein N1 and N3 (α+β)	1=very small
		2=small
		3=medium
		4=large
		5=very large
OIV 081	Mature leaf: particularities of petiole sinus	1=none
		2=petiole sinus often limited through nerves at petiole end
		3=often a tooth on the margin
OIV 083-1	Mature leaf: shape of base of upper leaf sinuses	1=V-shaped
		2=U-shaped
		3=Y-shaped
		4=presence of teeth
OIV 083-2	Mature leaf: shape of base of lower leaf sinuses	1=V-shaped
		2=U-shaped
		3=Y-shaped
		4=presence of teeth
OIV 084-1	Mature leaf: density of prostrate hairs (lower side)	1=none or very weak
		3=weak
		5=medium
		7=dense
		9=very dense
OIV 085-1	Mature leaf: density of erect hairs (lower side)	1=none or very weak
		3=weak
		5=medium
		7=dense
		9=very dense
OIV 151	Inflorescence: sex of flower	1=male
		2=male to hermaphrodite
		3=hermaphrodite
		4=female, with upright stamina
		5=female
OIV 221-1	Berry: length	1=very short (11 mm or less)
		3=short (14.5 mm)
		5=medium (18 mm)
		7=long (21.5 mm)
		9=very long (25 mm or more)
OIV 221-2	Berry: width	1=very short (10.5 mm or less)
		3=short (14.0 mm)
		5=medium (17.5 mm)
		7=long (21.0 mm)
		9=very long (24.5 mm or more)
OIV 223	Berry: shape	1=flat
		2=slightly flat
		3=roundish
		4=short elliptic
		5=ovate
		6=obtuse-ovate
		7=obovate
		8=cylindric
		9=long elliptic
		10=arched
OIV 225	Berry: color of skin	1=green-yellow
		2=rose,red,grey
		3=blue-black
OIV 230	Berry: color of flesh	1=not colored
		2=colored
OIV 242-1	Berry: length of seed	1=very short (3.8 mm or less)
		3=short (5.0 mm)
		5=medium (6.2 mm)
		7=long (7.4 mm)
		9=very long (8.6 mm or more)
OIV 242-2	Berry: width of seed	1=very short (2.2 mm or less)
		3=short (2.8 mm)
		5=medium (3.4 mm)
		7=long (4.0 mm)
		9=very long (4.6 mm or more)
OIV 243	Berry: weight of seeds	1=very low (20 mg or less)
		3=low (35 mg)
		5=medium (50 mg)
		7=high (65 mg)
		9=very high (80 mg or more)
OIV 503	Berry: single berry weight	1=very low (1.5 g or less)
		3=low (2.7 g)
		5=medium (3.9 g)
		7=high (5.1 g)
		9=very high (6.3 g or more)
