# Supplementary material
Source: MDPI journal article supplement (https://www.mdpi.com/2311-7524/9/7/743)
Supplement: s1 [file s1 › Table S3.pdf]

**Table S3.** SSR loci information (SSR locus name, primer sequence (F: forward primer, R: reverse primer) and references).

| No | SSR Loci | Primer Sequence (5' to 3')                                         | References |
|----|----------|--------------------------------------------------------------------|------------|
| 1  | VVS1     | F: acaattggaaaccgcgtggag<br>R: cttctcaatgatatctaaaacccatg          | [25]       |
| 2  | VVS2     | F: cagcccgtaaatgtatccatc<br>R: aaattcaaaattctaattcaactgg           | [25]       |
| 3  | VVMD5    | F: ctagagctacgccaatccaa<br>R: tataacaaaaatcatattcctaaa             | [26]       |
| 4  | VVMD7    | F: agagttgcggagaaacaggat<br>R: cgaaccttcacacgcttgat                | [26]       |
| 5  | VVMD21   | F: ggtgtctatggagttgatgttc<br>R: gcttcagtaaaaagggattgcg             | [26]       |
| 6  | VVMD24   | F: gtggatgatggagtagtcacgc,<br>R: gatttaggttcattgttggaagg           | [26]       |
| 7  | VVMD27   | F: gtaccagatctgaatacatccgtaagt<br>R: acgggtatagagcaaacggtgt        | [26]       |
| 8  | VVMD28   | F: aacaattcaatgaaaagagagagagaga<br>R: tcatcaatttcgtatctctatttgcgtg | [26]       |
| 9  | VVMD31   | F: cagtggttttcttaaagttcaagg<br>R: ctctgtgaaagaggaagagacgc          | [26]       |
| 10 | VrZAG21  | F: tcattcactcactgcattcatcggc<br>R: ggggctactccaaagtcagttcttg       | [27]       |
| 11 | VrZAG47  | F: ggtctgaatacatccgtaagtatat<br>R: acgggtgtgctctcattgtcattgac      | [27]       |
| 12 | VrZAG62  | F: ggtgaaatgggcaccgaacacacgc<br>R: ccatgtctctcctcagcttctcagc       | [27]       |
| 13 | VrZAG64  | F: tatgaaagaaacccaacgcggcag<br>R: tgcaatgtggtcagcctttgatggg        | [27]       |
| 14 | VrZAG79  | F: agattgtggaggagggaacaaaccg<br>R: tgccccattttcaaactcccttc         | [27]       |
| 15 | VrZAG83  | F: ggcggaggcggtagatgagaggcg<br>R: acgcaacggctagtaaatacaacgg        | [27]       |
| 16 | VrZAG112 | F: cgtttaaagccagctgaattctggg<br>R: tggctccatactgcttcacgtaggc       | [27]       |
| 17 | VMC2H4   | F: accaggtgtgcctataagaatc,<br>R: tctctggaacatccaatcaac             | [28]       |
| 18 | VMC2C3   | F: tgcaatccattattatctctt<br>R: aatattttagaatgggtgctttt             | [28]       |
| 19 | VVIH54   | F: ccgcactgtgttgaatttcag,<br>R: caaacggttttacaccagcag              | [29]       |
| 20 | VVIB01   | F: tgaccctcgaccttaaaatctt,<br>R: tggtgagtgaatgatagtaga             | [29]       |
| 21 | VVMD25   | F: ttccgttaaagcaaaagaaaaagg<br>R: ttggatttgaaatttattgagggg         | [26]       |
| 22 | VVMD32   | F: tatgatttttaggggggtgagg<br>R: ggaaagatgggatgactcgc               | [26]       |
